# Supplementary material
Source: PubMed Central journal article supplement (PMC2854250)
Supplement: NIHMS164342-supplement-1_si_001.pdf [file NIHMS164342-supplement-1_si_001.pdf]

## More Fluorous Surface Modifier Makes it Less Oleophobic: Fluorinated-Siloxane Copolymer/PDMS Coatings.

Wei Zhang,<sup>1</sup> Ying Zheng,<sup>1</sup> Lorenzo Orsini,<sup>1</sup> Andrea Morelli,<sup>2</sup> Giancarlo Galli,<sup>2</sup> Emo Chiellini,<sup>2</sup> Everett Carpenter,<sup>3</sup> and Kenneth J. Wynne<sup>1\*</sup>

<sup>1</sup>Department of Chemical and Life Science Engineering, Virginia Commonwealth University, 601 West Main St., Richmond, VA 23284-3028

<sup>2</sup> Dipartimento di Chimica e Chimica Industriale, Università di Pisa, UdR Pisa – INSTM, Via Risorgimento 35, 56126 Pisa, Italy;

<sup>3</sup>Department of Chemistry, 1001 West Main St., Richmond, Virginia 23284-2006

-----  
\* To whom correspondence should be addressed. Chemical and Life Science Engineering, Virginia Commonwealth University, 601 W. Main Street, Richmond, VA 23284-3028, Ph: 804-828-9303, Fax:804-828-3846, E-mail: kjwynne@vcu.edu

### **Supplementary Information.**

#### 1. Dynamic Light Scattering

The mean particle size (z-average) is calculated according to the Stokes-Einstein equation.<sup>1</sup>

$$d = \frac{kT}{3\pi\eta D} \quad \text{Eq. (1)}$$

where,  $d$  is the hydrodynamic diameter,  $k$  is the Boltzmann's constant,  $T$  is absolute temperature,  $D$  is translational diffusion coefficient, and  $\eta$  is the viscosity. The solvent viscosity at room temperature, 800 cSt, was used for convenience during measurements. A correction was made later to account for dependence of viscosity on temperature. PDMS solvent viscosities at different temperatures were calculated based on a viscosity-temperature coefficient (VTC) of 0.6. Assuming a linear relationship in the temperature range of 38 – 99 °C,<sup>2</sup> VTC is defined as:

$$VTC = 1 - \frac{\text{viscosity @ 99 °C}}{\text{viscosity @ 38 °C}} \quad \text{Eq. (2)}$$

This linear relationship is assumed valid within the temperature range investigated. Given the PDMS solvent viscosity of 800 cSt at 25 °C, Eq. (2) can be converted to

$$\Delta\eta / \Delta T = 7\text{cSt}^\circ\text{C}$$

Eq. (3)

Therefore, the corrected particle size,  $d_{corr}$  can be calculated from the corrected viscosity at given temperature by

$$d_{corr} = d \cdot k_\eta$$

Eq. (4)

with  $k_\eta = 800/[800 - 7T]$  and  $T$  is temperature in °C.

The fit of data points is done by the cumulants analysis from which the z-average diameter and polydispersity index are calculated according to ISO13321. The data points used in the analysis are from the actual data in the correlation function obtained by

selecting a sub-set of points geometrically spaced and normalizing these by subtracting the baseline

The sizes are in z-average diameter, as derived from DLS measurements. For each condition, 16 measurements were done and the average of the z-average diameter was taken as the particle size and the standard error was reported as the error in Table 1.

## **References**

(1) ISO13321; Particle size analysis -- Photon correlation spectroscopy: 1996.

(2) Coefficient and VTC definition equation is provided by Gelest, Inc in the "Silicon Compounds: Silanes & Silicones" catalog (2008) for a trimethylsiloxy terminated PDMS compound with same molecular weight and viscosity as the silanol terminated PDMS used for DLS study.
